# Supplementary material
Source: PubMed Central journal article supplement (PMC5221752)

A

| Sample | Sequences assigned to clonotypes | Independent clonotypes identified | Clonotypes above 1% of total samples | Clonal Size of major clonotypes | VDJ Clonal Association | CDR3 Sequence      | SMH in the V region | Homogeneity (size of clonotypes) | Number of Variants |
|--------|----------------------------------|-----------------------------------|--------------------------------------|---------------------------------|------------------------|--------------------|---------------------|----------------------------------|--------------------|
| # 1    | 6517                             | 3015                              | 3                                    | 1.69%                           | [V2-5/D1-1/JH1]        | AKNRAIYYGSTYGDFV   | 1.5%                | 44.55%                           | 13                 |
|        |                                  |                                   |                                      | 1.10%                           | [V8-8/D1-1/JH1]        | ARIYYGYSYWFV       | 1.23%               | 93.06%                           | 4                  |
|        |                                  |                                   |                                      | 1.00%                           | [V8-12/D4-1/JH1]       | ARRGVGRKGYFV       | 1.38%               | 100%                             | 1                  |
| # 2    | 7962                             | 1617                              | 6                                    | 52.21%                          | [V8-12/D2-4/JH1]       | ARRRGLRWYFV        | 0.57%               | 60%                              | 18                 |
|        |                                  |                                   |                                      | 2.20%                           | [V1-78/D1-1/JH2]       | ARYGPYYFDY         | 1.25%               | 96.57%                           | 5                  |
|        |                                  |                                   |                                      | 1.58%                           | [V8-12/D/JH1]          | ARYFDV             | 0.59%               | 95.24%                           | 2                  |
|        |                                  |                                   |                                      | 1.41%                           | [V9-3/D2-4/JH1]        | ARSSASLIYYDYEGYCDV | 1.60%               | 88.39%                           | 6                  |
|        |                                  |                                   |                                      | 1.34%                           | [V6-3/D4-1/JH2]        | TEANWAFYFDY        | 0.55%               | 95.33%                           | 3                  |
|        |                                  |                                   |                                      | 1.13%                           | [V1-9/D3-1/JH2]        | ARSWLGLYFDY        | 2.01%               | 96.67%                           | 3                  |
|        |                                  |                                   |                                      | 7.09%                           | [V14-4/D2-14/JH2]      | TTRYQ              | 1.39%               | 93.58%                           | 6                  |
| # 3    | 9973                             | 3895                              | 8                                    | 4.84%                           | [V8-8/D1-1/JH2]        | ARIAPLFIITVVPFDY   | 0.8%                | 53.62%                           | 20                 |
|        |                                  |                                   |                                      | 3.30%                           | [V1-53/D2-1/JH2]       | ARLLGDY            | 1.74%               | 93.01%                           | 6                  |
|        |                                  |                                   |                                      | 3.08%                           | [V9-1/D2-5/JH4]        | VMKGDYSNYVRGYYAMDY | 0.83%               | 82.41%                           | 10                 |
|        |                                  |                                   |                                      | 2.11%                           | [V1-53/D2-14/JH2]      | ARLIGDY            | 1.54%               | 51.43%                           | 2                  |
|        |                                  |                                   |                                      | 1.74%                           | [V3-6/D2-13/JH2]       | ARDGDWGYFDY        | 0.6%                | 98.28%                           | 3                  |
|        |                                  |                                   |                                      | 1.65%                           | [V8-8/D2-14/JH2]       | AQIDWYYFDY         | 0.8%                | 36.26%                           | 10                 |
|        |                                  |                                   |                                      | 1.32%                           | [V1-80/D2-13/JH2]      | ARDWRRFDY          | 1.83%               | 100%                             | 1                  |

B

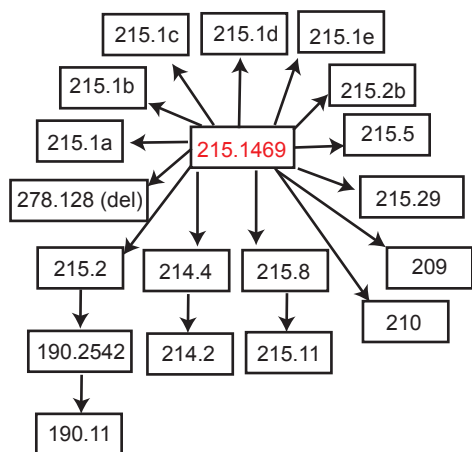

C

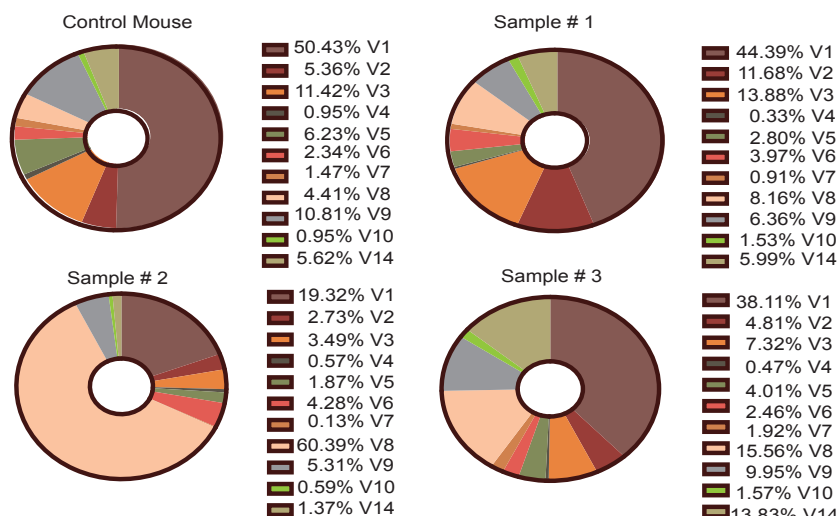

D

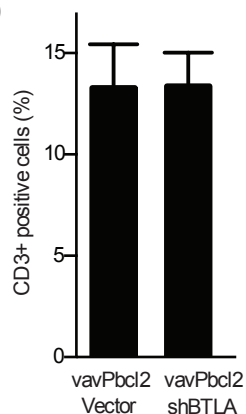

E

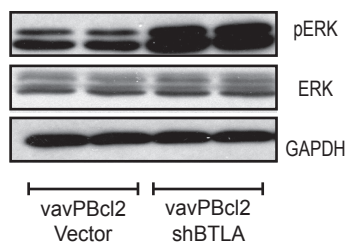

Supplement: NIHMS813031-supplement-03.pdf [file NIHMS813031-supplement-03.pdf]
