# Supplementary material
Source: PubMed Central journal article supplement (PMC5221752)
Supplement: NIHMS813031-supplement-08.pdf [file NIHMS813031-supplement-08.pdf]

Table S1. Mutational Analysis of FL Samples

MSKCC dataset 28 samples

Michigan data set 113 samples

GRCh37/hg19

| MKSCC DATA SET (28 samples) | Amino Acid | Type     | Transcript              | Amino acid              | Ensemble Position |
|-----------------------------|------------|----------|-------------------------|-------------------------|-------------------|
|                             |            |          | position:<br>alteration | position:<br>alteration |                   |
| 1                           | 1          | Missense | A>T                     | M>L                     | 2488104           |
| 2                           | 110        | Missense | A>C                     | N>I                     | 2491286           |
| 3                           | 122        | Missense | C>A                     | S>R                     | 2491323           |
| 4                           | 126        | Missense | T>A                     | F>L                     | 2491333           |
| 5                           | 157        | Missense | G>A                     | S>N                     | 2492072           |

| MICHIGAN DATA SET (113 samples) | Amino Acid | Type       | Transcript              | Amino acid              | Ensemble Position |
|---------------------------------|------------|------------|-------------------------|-------------------------|-------------------|
|                                 |            |            | position:<br>alteration | position:<br>alteration |                   |
| 1                               | 1          | Missense   | T>A                     | M>K                     | 2488105           |
| 2                               | 1          | Missense   | G>A                     | M>L                     | 2488106           |
| 3                               | 1          | Missense   | G>A                     | M>L                     | 2488106           |
| 4                               | 12         | Truncation | G>A                     | W>X                     | 2488138           |
| 5                               | 12         | Truncation | G>A                     | W>X                     | 2488139           |
| 6                               | 36         | Missense   | C>A                     | A>D                     | 2489202           |
| 7                               | 42         | Missense   | G>T                     | C>F                     | 2489220           |
| 8                               | 53         | Missense   | G>A                     | C>Y                     | 2489253           |
| 9                               | 54         | Truncation | C>A                     | C>X                     | 2489257           |
| 10                              | 57         | Missense   | C>G                     | C>W                     | 2489266           |
| 11                              | 57         | Missense   | G>C                     | C>S                     | 2489265           |
| 12                              | 61         | Truncation | T>G                     | Y>X                     | 2489786           |
| 13                              | 62         | Missense   | G>C                     | R>P                     | 2489788           |
| 14                              | 63         | Missense   | T>G                     | V>G                     | 2489791           |
| 15                              | 68         | Missense   | G>A                     | G>R                     | 2489805           |
| 16                              | 69         | Truncation | G>T                     | E>X                     | 2489808           |
| 17                              | 72         | Missense   | G>T                     | G>V                     | 2489818           |
| 18                              | 73         | Missense   | C>A                     | T>K                     | 2489821           |
| 19                              | 82         | Missense   | A>C                     | T>P                     | 2489847           |
| 20                              | 83         | Missense   | T>G                     | Y>D                     | 2489850           |
| 21                              | 88         | Missense   | A>T                     | N>I                     | 2489865           |
| 22                              | 95         | Truncation | C>T                     | Q>X                     | 2489886           |
| 23                              | 96         | Truncation | C>A                     | C>X                     | 2489891           |
| 24                              | 97         | Truncation | C>T                     | Q>X                     | 2489892           |
| 25                              | 97         | Truncation | C>T                     | Q>X                     | 2489892           |
| 26                              | 97         | Truncation | C>T                     | Q>X                     | 2489892           |
| 27                              | 102        | Missense   | G>C                     | A>P                     | 2489907           |
| 28                              | 111        | Missense   | G>A                     | C>Y                     | 2491289           |
| 29                              | 112        | Missense   | C>T                     | S>F                     | 2491292           |
| 30                              | 135        | Missense   | G>A                     | C>Y                     | 2491361           |
| 31                              | 158        | Truncation | C>T                     | Q>X                     | 2492074           |
| 32                              | 186        | Frameshift | A>GCTGGCT(S>FS          |                         | 2493116           |
| 33                              | 187        | Truncation | G>A                     | W>X                     | 2493120           |
| 34                              | 204        | Truncation | G>A                     | W>X                     | 2493171           |
| 35                              | 266        | Missense   | C>T                     | T>M                     | 2494657           |
