# Supplementary material
Source: PubMed Central journal article supplement (PMC5221752)
Supplement: NIHMS813031-supplement-09.pdf [file NIHMS813031-supplement-09.pdf]

| Table S2. Mutation and aCGH data sets and their sources |                   |                   |                                 |                      |            |
|---------------------------------------------------------|-------------------|-------------------|---------------------------------|----------------------|------------|
|                                                         | Data Set          | Number of Samples | Disease Indication              | Corresponding Figure | Reference  |
|                                                         | MKSCC             | 64                | Follicular Lymphoma             | Figure 1D, 1E, 1F    | Oricchio   |
|                                                         | UNMC              | 198               | Follicular Lymphoma             | Suppl Figure 1A, 1B  | Bouska     |
|                                                         | UNMC              | 67                | Transformed Follicular Lymphoma | Suppl Figure 1A, 1B  | Bouska     |
|                                                         | MSKCC             | 28                | Follicular Lymphoma             | Figure 1A, 1B, 1C    | n/a        |
|                                                         | Univ. of Michigan | 113               | Follicular Lymphoma             | Figure 1A, 1B, 1C    | Li, Yildiz |
