# Supplementary material
Source: PubMed Central journal article supplement (PMC5221752)
Supplement: NIHMS813031-supplement-10.pdf [file NIHMS813031-supplement-10.pdf]

Table S3. Gistic calls on FL and tFL patients

| UNNC: FL    |         | UNNC: FL    |         | HGCC: FL    |         |
|-------------|---------|-------------|---------|-------------|---------|
| Gene Symbol | HL64    | Gene Symbol | HL64    | Gene Symbol | HL64    |
| Locus ID    | 8764    | Locus ID    | 8764    | Locus ID    | 8764    |
|             | 1p36.32 |             | 1p36.32 |             | 1p36.32 |
| SLN1328     | -1      | SLN1073     | 2       | s1.1213P    | -2      |
| SLN1331     | 0       | SLN1075     | 0       | s1.1233N    | 0       |
| SLN1332     | -1      | SLN1076     | 0       | s1.1237P    | 0       |
| SLN1336     | 0       | SLN1077     | 0       | s1.1571P    | -2      |
| SLN1338     | 0       | SLN1080     | 0       | s1.1587N    | 0       |
| SLN1333     | -2      | SLN1081     | -2      | s1.1687N    | 0       |
| SLN1337     | -2      | SLN1086     | -2      | s1.2156P    | 0       |
| SLN1490     | 0       | SLN1088     | 0       | s1.2182P    | 0       |
| SLN1508     | 0       | SLN1090     | -2      | s1.2256P    | 0       |
| SLN1511     | 0       | SLN1098     | -2      | s1.2249P    | 0       |
| SLN1515     | 0       | SLN1099     | -2      | s1.2237P    | 0       |
| SLN1520     | 0       | SLN1104     | -2      | s1.2343P    | 0       |
| SLN1520     | 0       | SLN1106     | 0       | s1.26P      | -2      |
| SLN1533     | -2      | SLN1184     | 0       | s1.421P     | -2      |
| SLN1552     | -1      | SLN1186     | -2      | s1.469P     | 0       |
| SLN1696     | 2       | SLN1329     | 0       | s1.46P      | 0       |
| SLN1699     | -2      | SLN1351     | 0       | s1.158P     | -2      |
| SLN1701     | 0       | SLN1352     | 0       | s1.679P     | -2      |
| SLN1703     | 0       | SLN1358     | -2      | s1.718P     | 0       |
| SLN1705     | -2      | SLN1362     | -1      | s1.807P     | 0       |
| SLN1707     | -2      | SLN1364     | -2      | s2.1001P    | 0       |
| SLN1709     | 0       | SLN1370     | -1      | s2.1278N    | 0       |
| SLN1711     | -2      | SLN1416     | -2      | s2.1503P    | 0       |
| SLN1712     | 0       | SLN1417     | -2      | s2.1522P    | 0       |
| SLN1744     | 0       | SLN1418     | -2      | s2.2007N    | 0       |
| SLN1745     | 0       | SLN1419     | -2      | s2.2063P    | 0       |
| SLN1750     | 0       | SLN1422     | -2      | s2.2116N    | 0       |
| SLN1756     | 0       | SLN1425     | 0       | s2.2182P    | 0       |
| SLN1759     | 0       | SLN1426     | 0       | s2.2215P    | 0       |
| SLN1762     | 0       | SLN1427     | 0       | s2.2279P    | -2      |
| SLN17849    | 1       | SLN1428     | 0       | s2.2310P    | -1      |
| SLN4323     | 0       | SLN1429     | -1      | s2.2343P    | 0       |
| SLN438      | 0       | SLN1440     | 0       | s2.2348P    | 0       |
| SLN439      | -2      | SLN1445     | 0       | s2.2375P    | 0       |
| SLN440      | 0       | SLN1472     | 0       | s2.2386N    | 0       |
| SLN442      | -2      | SLN1476     | 0       | s2.2384N    | -2      |
| SLN444      | 0       | SLN1477     | 0       | s2.2487N    | 0       |
| SLN445      | 0       | SLN1479     | 0       | s2.491P     | 0       |
| SLN446      | 1       | SLN1480     | 0       | s2.491N     | 0       |
| SLN447      | 1       | SLN1504     | 0       | s2.966P     | -2      |
| SLN450      | -1      | SLN1508     | 0       | s3a.1109P   | 0       |
| SLN451      | 1       | SLN1505     | -1      | s3a.1122P   | 0       |
| SLN458      | 0       | SLN1507     | 0       | s3a.1277P   | -2      |
| SLN439      | 0       | SLN1518     | 0       | s3a.1444N   | 0       |
| SLN445      | 0       | SLN1336     | 0       | s3a.1513P   | -1      |
| SLN447      | 0       | SLN1506     | 0       | s3a.1513P   | -2      |
| SLN449      | -2      | SLN1545     | -1      | s3a.1932P   | -2      |
| SLN470      | 0       | SLN1548     | 0       | s3a.2182P   | -1      |
| SLN471      | -1      | SLN1557     | -2      | s3a.2320P   | 0       |
| SLN473      | 0       | SLN1579     | -2      | s3a.2329P   | -1      |
| SLN474      | -2      | SLN1581     | -2      | s3a.2353N   | 0       |
| SLN476      | 0       | SLN1586     | 0       | s3a.2377P   | 0       |
| SLN530      | 0       | SLN1588     | 0       | s3a.2358N   | 0       |
| SLN548      | -1      | SLN1604     | -2      | s3a.843N    | 0       |
| SPC5483     | -1      | SLN1606     | -2      | s3a.865P    | 0       |
| ZLN001      | 0       | SLN1608     | 0       | s3b.1053P   | 0       |
| ZLN002      | -1      | SLN1610     | 0       | s3b.1175P   | 0       |
| ZLN007      | -1      | SLN1610     | 0       | s3b.1175P   | 0       |
| ZLN008      | -2      | SLN1611     | -2      | s3b.1377P   | 0       |
| ZLN013      | 0       | SLN1617     | 0       | s3b.1530P   | -2      |
| ZLN018      | 0       | SLN1620     | 0       | s3b.2181N   | -1      |
| ZLN021      | -2      | SLN1624     | -2      | s3b.2326P   | -1      |
| ZLN024      | 0       | SLN1625     | -2      | s3b.497N    | -2      |
| ZLN026      | -1      | SLN1626     | 0       | s1.947P     | 0       |
| ZLN028      | 0       | SLN1627     | 0       |             |         |
| ZLN029      | 0       | SLN1638     | -1      |             |         |
| ZLN038      | 0       | SLN1643     | 0       |             |         |
| ZLN038      | 0       | SLN1644     | 0       |             |         |
|             |         | SLN1646     | -2      |             |         |
|             |         | SLN1647     | 0       |             |         |
|             |         | SLN1648     | 0       |             |         |
|             |         | SLN1648     | 0       |             |         |
|             |         | SLN1654     | 0       |             |         |
|             |         | SLN1656     | -2      |             |         |
|             |         | SLN1661     | -1      |             |         |
|             |         | SLN1662     | 0       |             |         |
|             |         | SLN1664     | 0       |             |         |
|             |         | SLN1669     | 0       |             |         |
|             |         | SLN1670     | 0       |             |         |
|             |         | SLN1675     | -2      |             |         |
|             |         | SLN1681     | 0       |             |         |
|             |         | SLN1684     | -2      |             |         |
|             |         | SLN1695     | 0       |             |         |
|             |         | SLN1697     | 0       |             |         |
|             |         | SLN1698     | 0       |             |         |
|             |         | SLN1700     | 0       |             |         |
|             |         | SLN1702     | 0       |             |         |
|             |         | SLN1704     | 0       |             |         |
|             |         | SLN1706     | -2      |             |         |
|             |         | SLN1708     | 0       |             |         |
|             |         | SLN1719     | -2      |             |         |
|             |         | SLN1720     | -2      |             |         |
|             |         | SLN1729     | -2      |             |         |
|             |         | SLN1732     | 0       |             |         |
|             |         | SLN1735     | -2      |             |         |
|             |         | SLN1743     | -1      |             |         |
|             |         | SLN1744b    | 0       |             |         |
|             |         | SLN1761     | 0       |             |         |
|             |         | SLN1764     | 0       |             |         |
|             |         | SLN1781     | 0       |             |         |
|             |         | SLN1783     | 1       |             |         |
|             |         | SLN1784     | 0       |             |         |
|             |         | SLN1788     | -1      |             |         |
|             |         | SLN1791     | -2      |             |         |
|             |         | SLN1792     | 0       |             |         |
|             |         | SLN1794     | 0       |             |         |
|             |         | SLN1799     | 0       |             |         |
|             |         | SLN1811     | -2      |             |         |
|             |         | SLN1825     | 0       |             |         |
|             |         | SLN1826     | -2      |             |         |
|             |         | SLN1828     | 0       |             |         |
|             |         | SLN1832     | -1      |             |         |
|             |         | SLN1834     | 0       |             |         |
|             |         | SLN1835     | -1      |             |         |
|             |         | SLN1836     | 0       |             |         |
|             |         | SLN1839     | -2      |             |         |
|             |         | SLN1844     | 0       |             |         |
|             |         | SLN1845     | 0       |             |         |
|             |         | SLN1850     | 0       |             |         |
|             |         | SLN1853     | 0       |             |         |
|             |         | SLN1854     | 0       |             |         |
|             |         | SLN1855     | 0       |             |         |
|             |         | SLN1862     | 0       |             |         |
|             |         | SLN1866     | -1      |             |         |
|             |         | SLN1873     | 0       |             |         |
|             |         | SLN1876     | 0       |             |         |
|             |         | SLN1879     | 0       |             |         |
|             |         | SLN1880     | -2      |             |         |
|             |         | SLN1882     | 0       |             |         |
|             |         | SLN1894     | 0       |             |         |
|             |         | SLN1900     | -2      |             |         |
|             |         | SLN1903     | -2      |             |         |
|             |         | SLN1904     | 0       |             |         |
|             |         | SLN1906     | 0       |             |         |
|             |         | SLN1910     | 0       |             |         |
|             |         | SLN1912     | -2      |             |         |
|             |         | SLN1916     | 0       |             |         |
|             |         | SLN1918     | 0       |             |         |
|             |         | SLN1919     | 0       |             |         |
|             |         | SLN2081     | 0       |             |         |
|             |         | SLN735      | -2      |             |         |
|             |         | SLN758      | 0       |             |         |
|             |         | SLN876      | -2      |             |         |
|             |         | SLN878      | 0       |             |         |
|             |         | SLN888      | -2      |             |         |
|             |         | SPC51260    | 0       |             |         |
|             |         | SPC51283    | 0       |             |         |
|             |         | SPC51364    | 0       |             |         |
|             |         | SPC51348    | 0       |             |         |
|             |         | SPC51372    | 0       |             |         |
|             |         | SPC52403    | 2       |             |         |
|             |         | SPC52445    | 0       |             |         |
|             |         | SPC52457    | -2      |             |         |
|             |         | ZLN0030     | -2      |             |         |
|             |         | ZLN0031     | 0       |             |         |
|             |         | ZLN0032     | 0       |             |         |
|             |         | ZLN0033     | -2      |             |         |
|             |         | ZLN0034     | -1      |             |         |
|             |         | ZLN0035     | 0       |             |         |
|             |         | ZLN0039     | 0       |             |         |
|             |         | ZLN0041     | 0       |             |         |
|             |         | ZLN0042     | -1      |             |         |
|             |         | ZLN0053     | 0       |             |         |
|             |         | ZLN0044     | 0       |             |         |
|             |         | ZLN0045     | 0       |             |         |
|             |         | ZLN0046     | 0       |             |         |
|             |         | ZLN0047     | -1      |             |         |
|             |         | ZLN0050     | 0       |             |         |
|             |         | ZLN0051     | -2      |             |         |
|             |         | ZLN0052     | -1      |             |         |
|             |         | ZLN0053     | 0       |             |         |
|             |         | ZLN0054     | 0       |             |         |
|             |         | ZLN0055     | 0       |             |         |
|             |         | ZLN0056     | 0       |             |         |
|             |         | ZLN0057     | 0       |             |         |
|             |         | ZLN0060     | 0       |             |         |
|             |         | ZLN0061     | 0       |             |         |
|             |         | ZLN0062     | -2      |             |         |
|             |         | ZLN0063     | -2      |             |         |
|             |         | ZLN0064     | 0       |             |         |
|             |         | ZLN0065     | 0       |             |         |
|             |         | ZLN0066     | 0       |             |         |
|             |         | ZLN0073     | -2      |             |         |
|             |         | ZLN0076     | 0       |             |         |
|             |         | ZLN0077     | 0       |             |         |
|             |         | ZLN0079     | 0       |             |         |
|             |         | ZLN0080     | 0       |             |         |
|             |         | ZLN0081     | 0       |             |         |
|             |         | ZLN0083     | 0       |             |         |
|             |         | ZLN0084     | 0       |             |         |
|             |         | ZLN0085     | 0       |             |         |
|             |         | ZLN0086     | 0       |             |         |
|             |         | ZLN0087     | 0       |             |         |
|             |         | ZLN0088     | -1      |             |         |
|             |         | ZLN0089     | 0       |             |         |
|             |         | ZLN0090     | -2      |             |         |
|             |         | ZLN0091     | 0       |             |         |
|             |         | ZLN0092     | -2      |             |         |
