# Supplementary material
Source: PubMed Central journal article supplement (PMC5221752)
Supplement: NIHMS813031-supplement-11.pdf [file NIHMS813031-supplement-11.pdf]

Table S4. HVEM Sequencing Primers

| Gene/Exon  | Primers                 | Seq. primer origin | Mol W | Tem(DMSO) | Tem(2micLRX) | Tem(4miLgRX) | Tem(Ly1) |
|------------|-------------------------|--------------------|-------|-----------|--------------|--------------|----------|
| HVEM-PN1-F | GGTGGGTCTGAGAGACGTG     |                    | 500   | 63        |              |              |          |
| HVEM-PN1-R | CATGGAGAGAGGGTGACG      |                    |       |           |              |              |          |
| HVEM-PN1-S | AGAGGGTGCAGGGTGCAGGGG R |                    |       |           |              |              |          |
| HVEM-PN2-F | GAGGTCTCATCCTGGAGCTG    |                    | 298   | 60        |              |              |          |
| HVEM-PN2-R | CTCACCCCTTGGCTTTCTT     |                    |       |           |              |              |          |
| HVEM-PN2-S | GCTGCCACCAGCCAGCCTCC F  |                    |       |           |              |              |          |
| HVEM-PN3-F | CTACTCAAGGCCGGGACAG     |                    | 395   | 63        |              |              |          |
| HVEM-PN3-R | ACCTTCAAGCCTTTCTGCTG    |                    |       |           |              |              |          |
| HVEM-PN3-S | CAGCCAGAGCCACCACCCAG F  |                    |       |           |              |              |          |
| HVEM-PN4-F | TTCTGAGGCACAGCTTGTC     |                    | 396 - |           |              | 60           |          |
| HVEM-PN4-R | ACTGTGGTGAGCCAGTGC      |                    |       |           |              |              |          |
| HVEM-PN4-S | GTGCTGGGGTCTGGGTTGAC R  |                    |       |           |              |              |          |
