# Supplementary material
Source: PubMed Central journal article supplement (PMC5221752)
Supplement: NIHMS813031-supplement-12.pdf [file NIHMS813031-supplement-12.pdf]

Table S5. Minimal Deleted Regions of Chr. 1p36

| Data Set | Number of Samples | Genes in MDR                                                 | Reference |
|----------|-------------------|--------------------------------------------------------------|-----------|
| MKSCC    | 64                | TNFRSF14, PLCH2, PANK4, HES5, C1orf93, PRDM16, MMEL1, ACTRT2 | Oricchio  |
| UNMC     | 198               | TNFRSF14, PLCH2, PANK4, HES5, C1orf93, RER1, PEX10           | Bouska    |
