# Supplementary material
Source: PubMed Central journal article supplement (PMC5221752)
Supplement: NIHMS813031-supplement-13.pdf [file NIHMS813031-supplement-13.pdf]

Table S6. Hairpin Sequences for shHVEM and shBTLA

**shHVEM**

shHVEM- Hairpin #1

CTCGAGGAAGGTATATTTCTGTTGACNGTGAGCGAAAACCTGATGATGTTCTCCTGTAGTGAAGCCACAGATGTACAGGAGAG  
**CACCATCAGGTTTCTGCCTACTGCCTCGGGAATTC**

shHVEM- Hairpin #2

CTCGAGGAAGGTATATTGCTGTTGACAGTGAGCGACCCCATGTGCAACCCAGGTTATAGTGAAGCCACAGATGTATAACCTGG  
**GTTGCACATGGGGCTGCCTACTCCTCGGGAATTC**

**shBTLA**

shBTLA- Hairpin #1

CTCGAGGAAGGTATATTTCTGTTGACNGTGAGCGAGGACACTAACCTGGTTGATATTAGTGAAGCCACAGATGTAATATCAAC  
**CAGGTTAGTGTCCCTGCCTACTGCCTCGGGAATTC**

shBTLA-Hairpin #2

CTCGAGGAAGGTATATTTCTGTTGACNGTGAGCGAAGAGTGTCCAGTGCAACTTACTAGTGAAGCCACAGATGTAGTAAGTTG  
**CACTGGACACTCTCTGCCTACTGCCTCGGGAATTC**
