# Supplementary material
Source: PubMed Central journal article supplement (PMC5221752)

Supplemental Figure 1

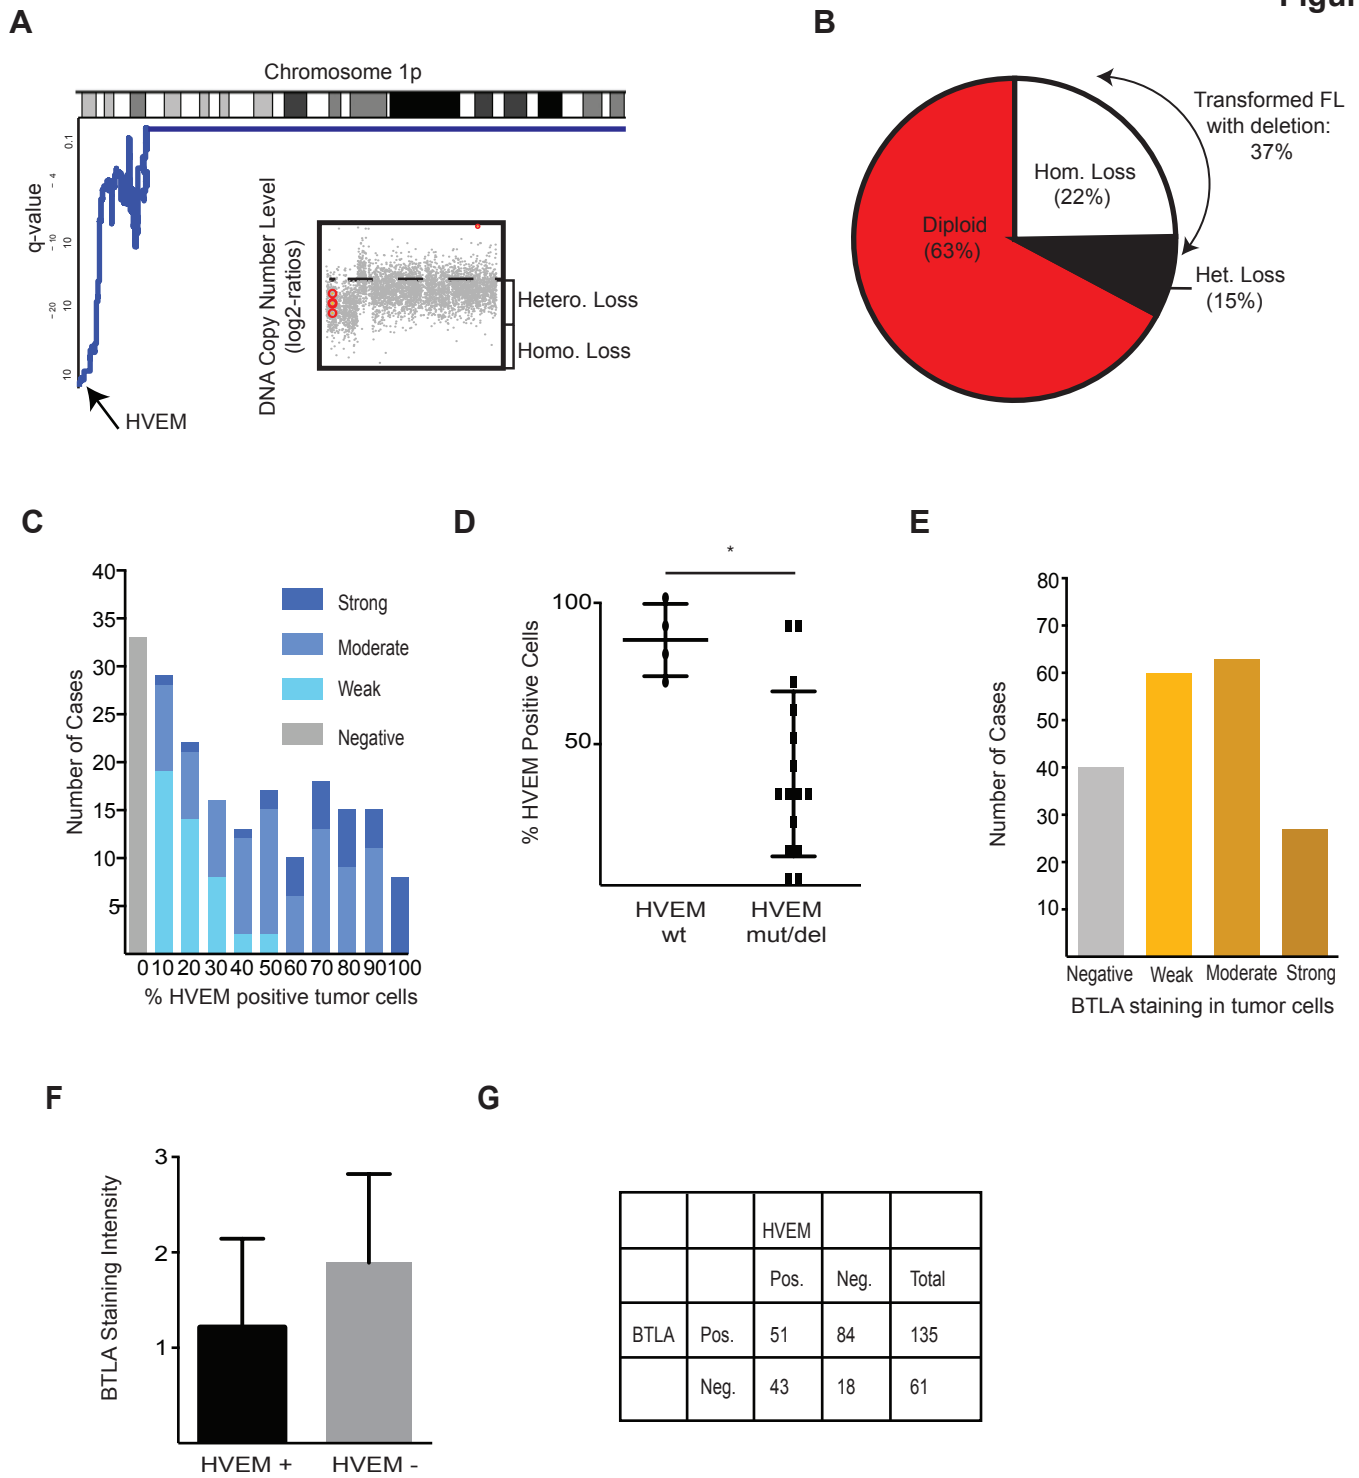

Supplement: NIHMS813031-supplement-01.pdf [file NIHMS813031-supplement-01.pdf]

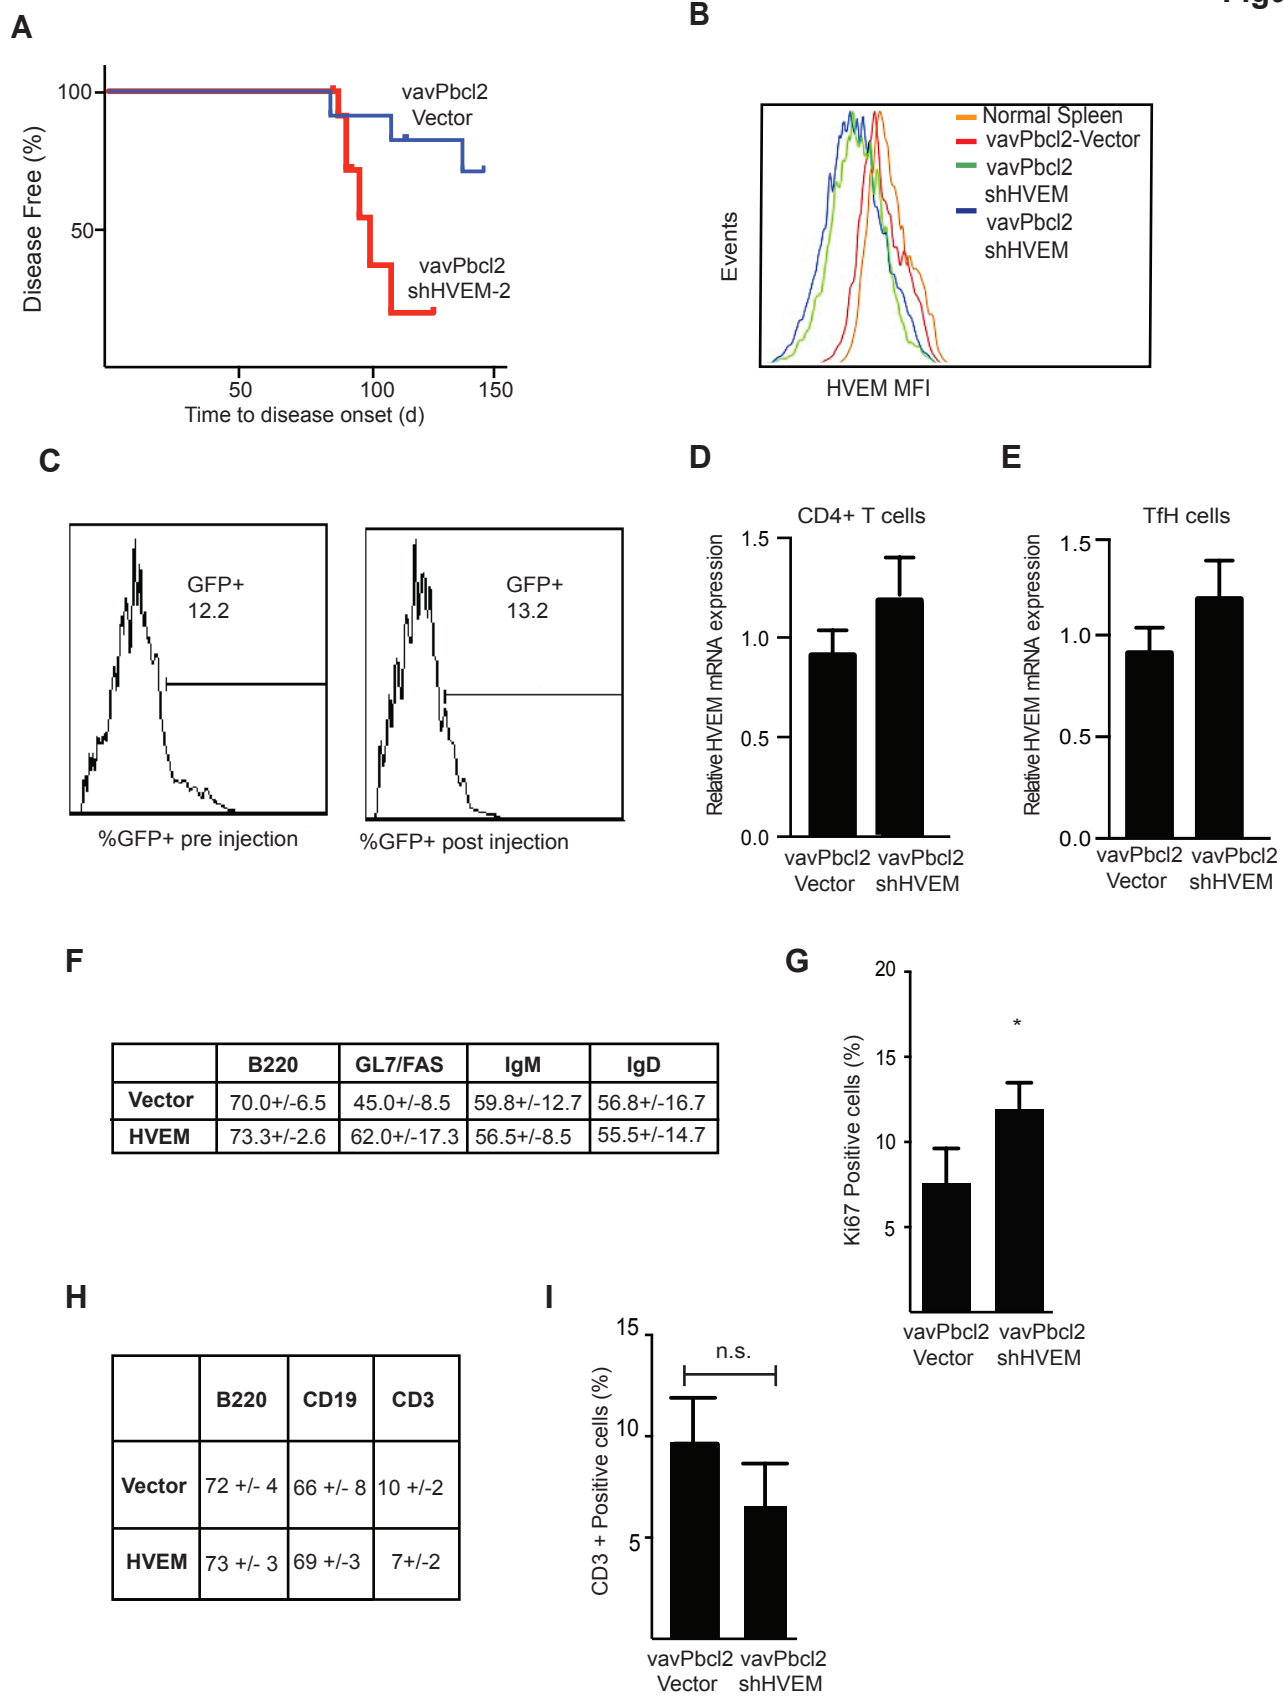

Supplement: NIHMS813031-supplement-02.pdf [file NIHMS813031-supplement-02.pdf]

# Supplemental Figure 4

**A**

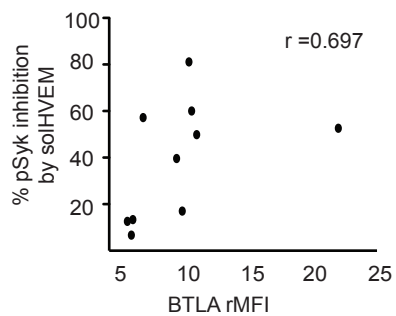

**B**

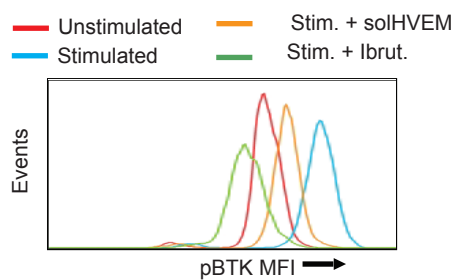

**C**

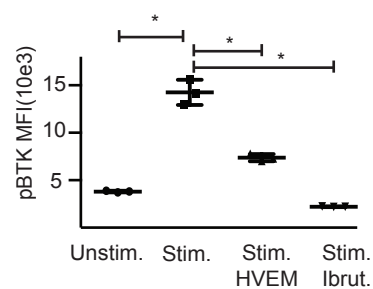

**D**

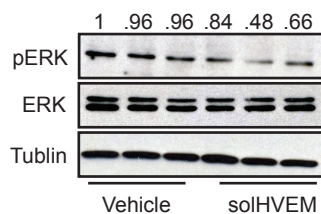

**E**

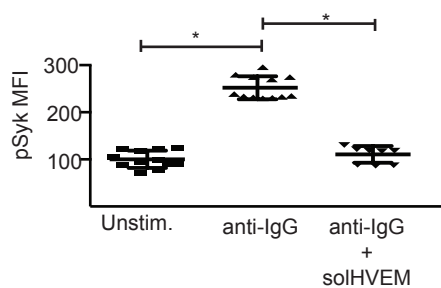

**F**

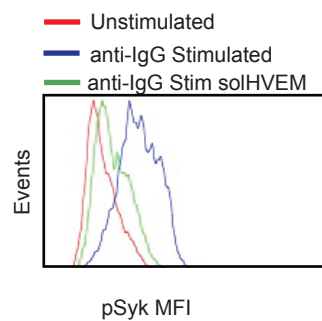

Supplement: NIHMS813031-supplement-04.pdf [file NIHMS813031-supplement-04.pdf]

Supplemental  
Figure 5

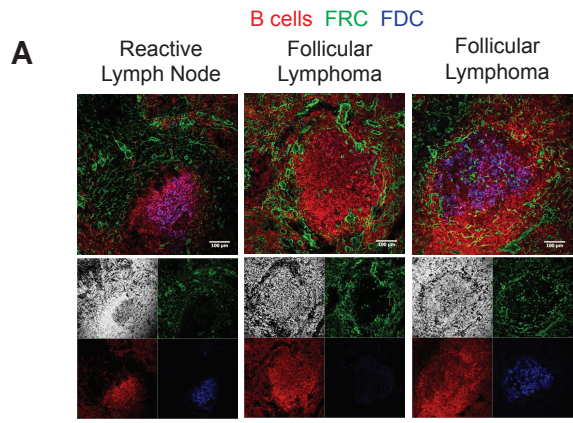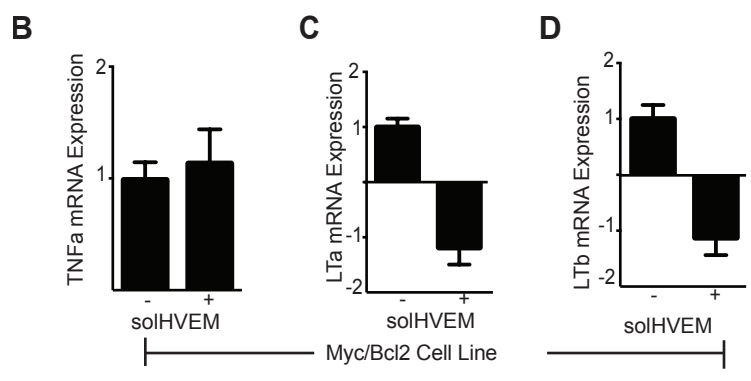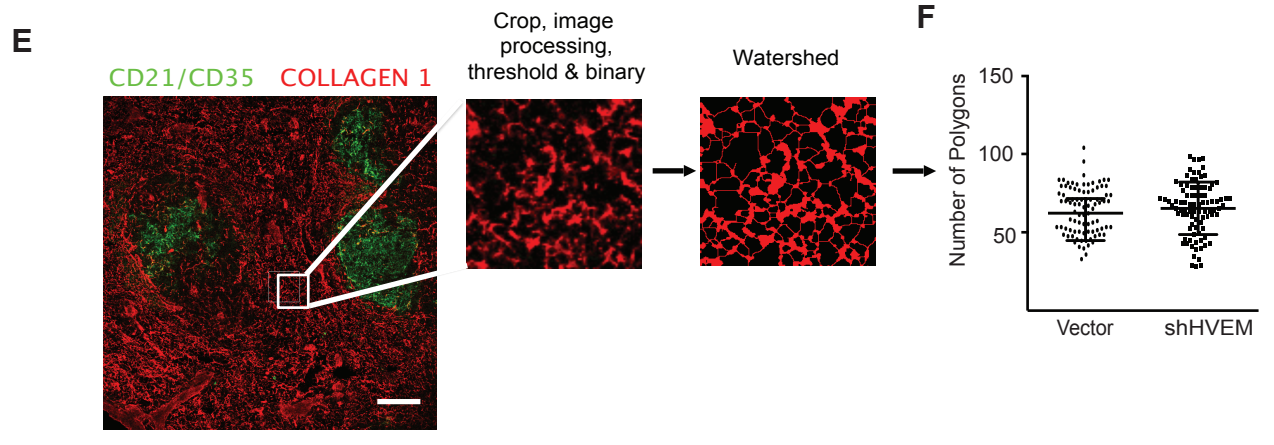

Supplement: NIHMS813031-supplement-05.pdf [file NIHMS813031-supplement-05.pdf]

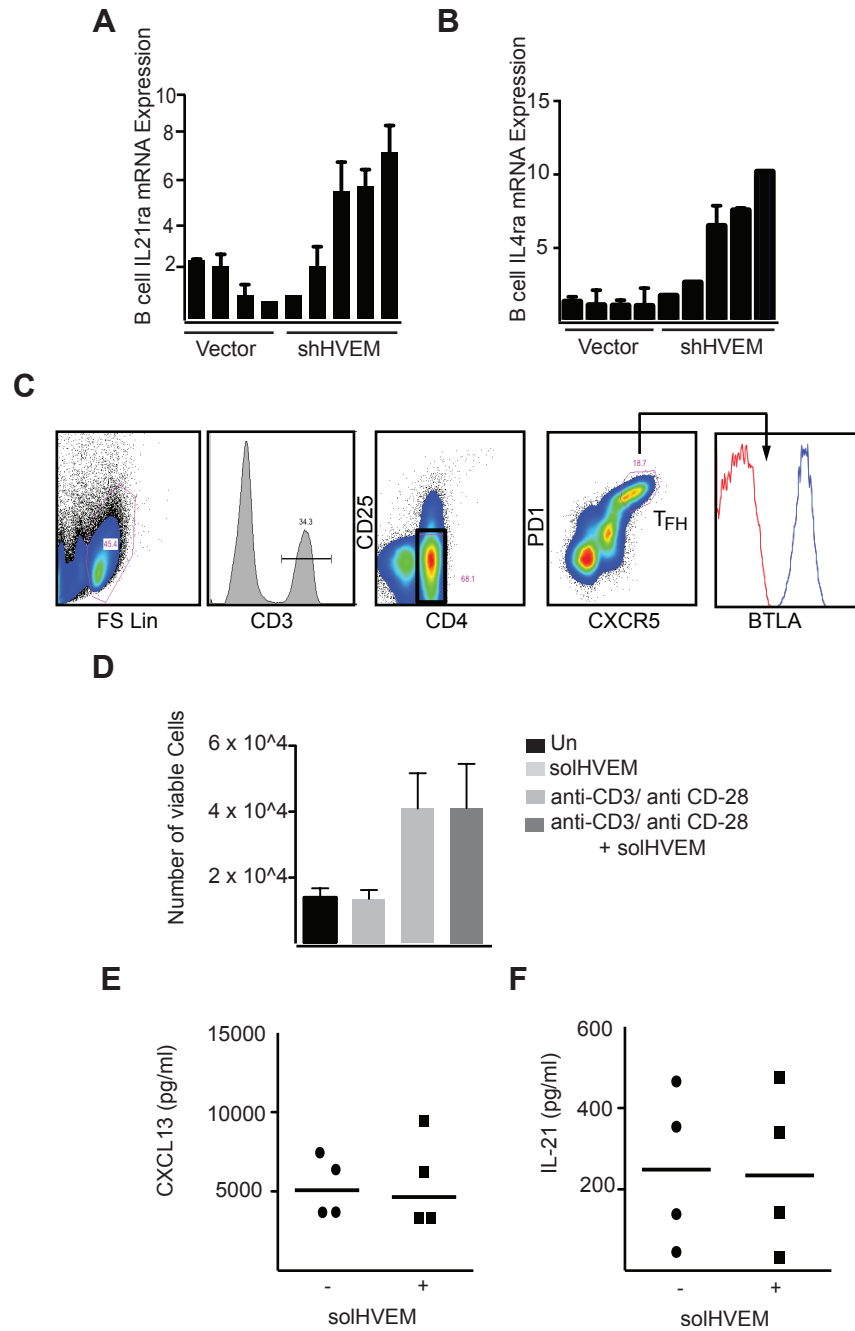

Supplement: NIHMS813031-supplement-06.pdf [file NIHMS813031-supplement-06.pdf]

# Supplemental Figure 7

**A**

|           | BTLA | HVEM |
|-----------|------|------|
| DOHH2     | +++  | -    |
| SU-DHL-4  | ++   | -    |
| SU-DHL-6  | +++  | -    |
| SU-DHL-8  | +    | +++  |
| SU-DHL-10 | +++  | -    |
| Raji      | +    | +++  |
| Ly10      | ++   | ++   |
| Myc-Bcl2  | +++  | +    |
| Bcl1      | +++  | +    |

**B**

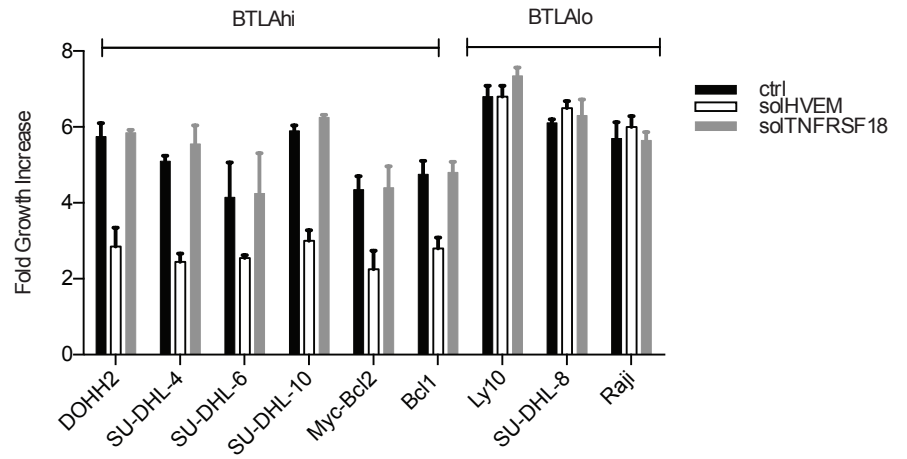

**C**

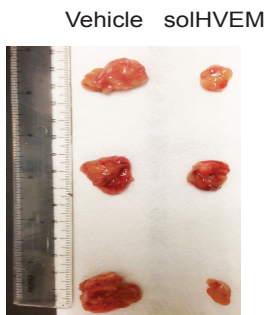

**D**

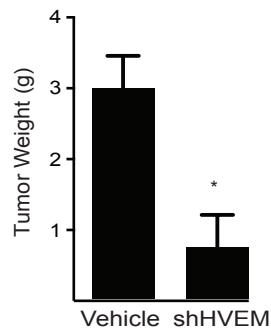

**E**

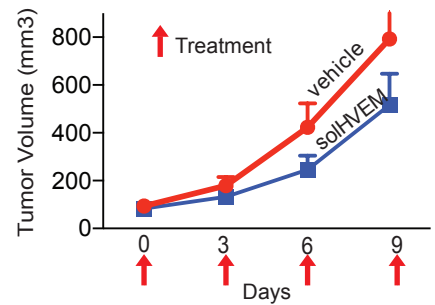

**F**

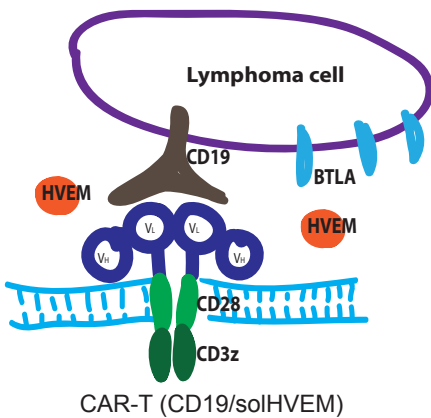

**G**

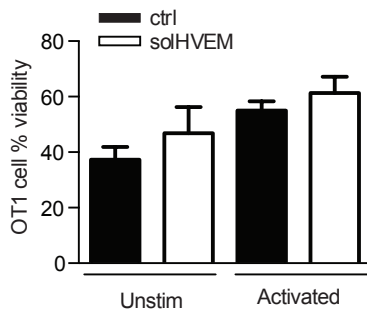

**H**

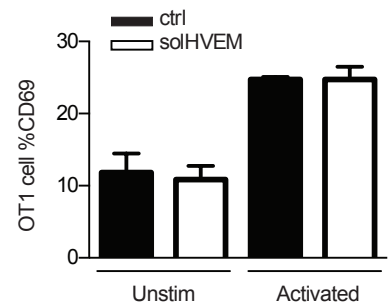

**I**

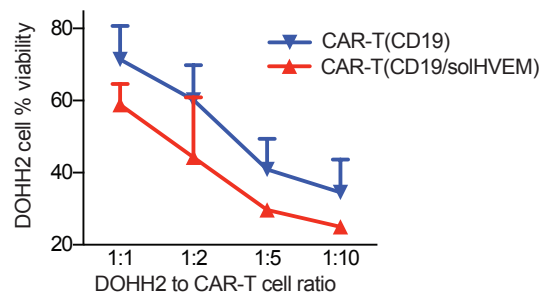

Supplement: NIHMS813031-supplement-07.pdf [file NIHMS813031-supplement-07.pdf]
